# Supplementary material for: Preoperative Serum Carbohydrate Antigen 19-9 Levels Cannot Predict the Surgical Resectability of Pancreatic Cancer: A Meta-Analysis
Source: PubMed Central journal article supplement (PMC9136945; doi:10.3389/pore.2022.1610266), 2022-05-10
Supplement: Table1.pdf [file Table1.pdf]

Table 1a: Characteristics of the included studies and the measured outcomes

| First Author       | Country         | Age                           |                                | Gender |        | Centers | Design        | Type of study      | Number of patients with preoperative CA 19-9 values available |
|--------------------|-----------------|-------------------------------|--------------------------------|--------|--------|---------|---------------|--------------------|---------------------------------------------------------------|
|                    |                 | Resectable                    | Unresectable                   | Male   | Female |         |               |                    |                                                               |
| Albatanony<br>2015 | Egypt           | 50,6 (+-<br>13,6 or<br>51-77) | 59,4 (+-<br>11,4 or 48-<br>76) | 26     | 14     | single  | retrospective | cross<br>sectional | 40                                                            |
| Almadi<br>2013     | Saudi<br>Arabia | 61,2 (+- 1,51)                |                                | 36     | 25     | single  | retrospective | cross<br>sectional | 61                                                            |
| Luo<br>2013        | China           | 60,7 (+-9,1)                  |                                | 115    | 97     | single  | retrospective | cross<br>sectional | 212                                                           |
| Kiliç<br>2006      | Turkey          | 56 (38-74)                    |                                | 28     | 23     | single  | prospective   | cross<br>sectional | 33                                                            |
| Kim<br>2009        | South<br>Korea  | 66,0 (+-10,2 or 41-88)        |                                | 60     | 54     | single  | retrospective | cross<br>sectional | 114                                                           |
| Ong<br>2008        | UK              | 63 (30-80)                    | 66,5 (30-80)                   | 64     | 45     | single  | retrospective | cross<br>sectional | 113                                                           |
| Santucci<br>2018   | France          | 63,4 (+-<br>12,3)             | 64,6 (+-<br>13,4)              | 97     | 74     | single  | retrospective | cross<br>sectional | 171                                                           |
| Zhang<br>2008      | China           | 59,0 (+-9 or 41-75)           |                                | 72     | 32     | single  | retrospective | cross<br>sectional | 104                                                           |
