# Supplementary material for: Preoperative Serum Carbohydrate Antigen 19-9 Levels Cannot Predict the Surgical Resectability of Pancreatic Cancer: A Meta-Analysis
Source: PubMed Central journal article supplement (PMC9136945; doi:10.3389/pore.2022.1610266), 2022-05-10
Supplement: Table3.pdf [file Table3.pdf]

Table 1c: Characteristics of the included studies and the measured outcomes

| First Author  | Number of patients with resectable pancreatic cancer | Number of patients with unresectable pancreatic cancer | preoperative CA19-9 level cutoff value (U/mL) | Area Under the Receiving Operating Characteristics Curve (AUC) | 95% confidence interval (CI) | Sensitivity (%) | Specificity (%) | Positive predictive Value (%) | Negative Predictive Value (%) | True Positives | False Positives | True Negatives | False Negatives |
|---------------|------------------------------------------------------|--------------------------------------------------------|-----------------------------------------------|----------------------------------------------------------------|------------------------------|-----------------|-----------------|-------------------------------|-------------------------------|----------------|-----------------|----------------|-----------------|
| Albatany 2015 | 30                                                   | 10                                                     | 307,55                                        | na                                                             | na                           | 100,00          | 88,67           | 71,43                         | 100,00                        | 9              | 3               | 28             | 0               |
| Almadi 2013   | 15                                                   | 46                                                     | 166,00                                        | 0,890                                                          | 0,708-0,989                  | 89,00           | 75,00           | 91,61                         | 56,08                         | 41             | 4               | 11             | 5               |
| Luo 2013      | 76                                                   | 136                                                    | 289,40                                        | 0,660                                                          | 0,590-0,740                  | 63,24           | 71,05           | 79,63                         | 51,92                         | 86             | 22              | 50             | 54              |
| Kiliç 2006    | 18                                                   | 15                                                     | 256,40                                        | 0,892                                                          | na                           | 82,40           | 92,30           | 91,40                         | 83,90                         | 14             | 1               | 15             | 3               |
| Kim 2009      | 24                                                   | 90                                                     | 92,77                                         | 0,720                                                          | 0,619-0,821                  | 67,80           | 75,00           | na                            | na                            | na             | na              | na             | na              |
| Ong 2008      | 55                                                   | 58                                                     | 473,00                                        | 0,670                                                          | 0,645-0,930                  | 81,80           | 55,60           | 66,01                         | 0,74                          | 47             | 24              | 31             | 11              |
| Santucci 2018 | 49                                                   | 122                                                    | 178,00                                        | 0,886                                                          | 0,832-0,932                  | 81,90           | 81,60           | 92,20                         | 70,00                         | 102            | 9               | 22             | 38              |
| Zhang 2008    | 58                                                   | 46                                                     | 353,15                                        | 0,918                                                          | 0,843-0,992                  | 93,10           | 78,30           | 84,38                         | 90,00                         | 54             | 10              | 36             | 4               |
